# Supplementary material
Source: PubMed Central journal article supplement (PMC4137332)
Supplement: Supp_Fig1.pdf [file Supp_Fig1.pdf]

## Supplementary Data

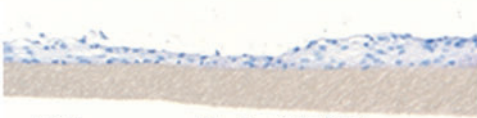

**Primary cells in SF3D**

**SUPPLEMENTARY FIG. S1.** Serum-free culture does not support cartilage tissue formation by primary chondrocytes. Primary bovine cells grown in three-dimensional (3D) culture on collagen-coated membrane insert failed to accumulate matrix in the SF3D culture system.  $n=9$  independent experiments.
