# Supplementary material
Source: PubMed Central journal article supplement (PMC4137332)
Supplement: Supp_Fig2.pdf [file Supp_Fig2.pdf]

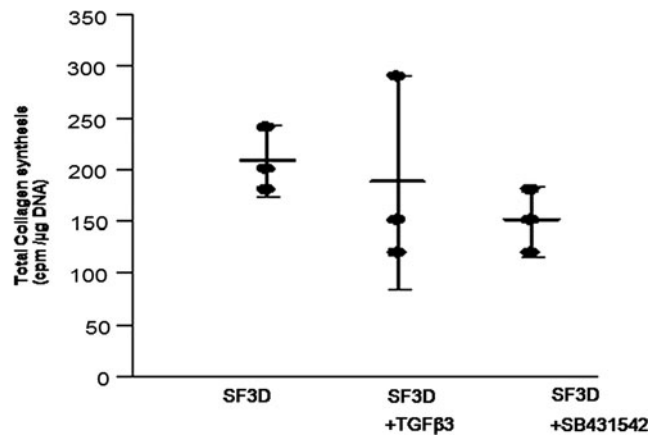

**SUPPLEMENTARY FIG. S2.** Exogenous transforming growth factor (TGF) $\beta$ 3 does not promote collagen synthesis by bovine P2 chondrocytes. Addition of TGF $\beta$ 3 (10 ng/mL) or an inhibitor of TGF $\beta$ 3 (SB431542) in SF3D cultures did not affect collagen synthesis by P2 chondrocytes. Each dot represents an independent experiment; horizontal lines represent mean and 95% confidence interval.  $n=3$  independent experiments.
